# Supplementary material
Source: PubMed Central journal article supplement (PMC2718836)
Supplement: NIHMS99064-supplement-supplement_1.pdf [file NIHMS99064-supplement-supplement_1.pdf]

1  
2  
3 1 Supplemental Data File 1. Quantile-quantile plots. Quantile-quantile plots are shown for each of  
4  
5 2 the 22 comparisons listed in Table 1 (e.g., see Figure 3).  
6

7  
8 3  
9  
10 4 Supplemental Data File 2. AFT model diagnostic plots. A series of diagnostic plots are shown  
11  
12 5 for evaluating goodness-of-fit of AFT models for each of the 22 comparisons listed in Table 1.  
13  
14 6 Graphical analyses of case-deletion influence measures, observed versus fitted survival curves,  
15  
16 7 cox-snell residuals, martingale residuals, deviance residuals and score residuals are presented.  
17  
18  
19 8

20  
21  
22 9 Supplemental Data File 3. Log-cumulative hazard plots. Log-cumulative hazard plots are shown  
23  
24 10 for each of the 22 comparisons listed in Table 1 (e.g., see Figure 5).  
25

26  
27 11  
28  
29 12 Supplemental Data File 4. Quantile regression analyses. Results from quantile regression  
30  
31 13 analyses are shown for each of the 22 comparisons listed in Table 1 (e.g., see Figure 6).  
32  
33  
34 14  
35  
36  
37  
38  
39  
40  
41  
42  
43  
44  
45  
46  
47  
48  
49  
50  
51  
52  
53  
54  
55  
56  
57  
58  
59  
60  
61  
62  
63  
64  
65
